# Supplementary material for: Effects of allelic variations in starch synthesis-related genes on grain quality traits of Korean nonglutinous rice varieties under different temperature conditions
Source: PubMed Central journal article supplement — Breed Sci. 2014 Jun 1;64(2):164–75. doi: 10.1270/jsbbs.64.164 (PMC4065324; doi:10.1270/jsbbs.64.164), 2014-06-01
Supplement: 64_164_1.pdf [file 64_164_1.pdf]

**Supplemental Table 1.** Descriptive statistics on grain quality traits evaluated in the three different growing conditions

| Trait <sup>a</sup> | Group <sup>b</sup> | Descriptive statistics <sup>c</sup> |       |       |         |       |       |         |       |       |        |       |       |
|--------------------|--------------------|-------------------------------------|-------|-------|---------|-------|-------|---------|-------|-------|--------|-------|-------|
|                    |                    | Mean                                |       |       | Maximum |       |       | Minimum |       |       | CV (%) |       |       |
|                    |                    | F                                   | GI    | GII   | F       | GI    | GII   | F       | GI    | GII   | F      | GI    | GII   |
| HRP (%)            | All                | 79.4                                | 60.2  | 49.1  | 94.9    | 94.0  | 89.7  | 46.5    | 18.8  | 17.9  | 11.4   | 26.2  | 35.3  |
|                    | J                  | 79.2                                | 58.8  | 47.3  | 94.9    | 87.5  | 82.3  | 46.5    | 18.8  | 17.9  | 11.7   | 25.8  | 35.1  |
|                    | T                  | 81.6                                | 74.8  | 66.5  | 93.8    | 94.0  | 89.7  | 68.3    | 38.2  | 30.3  | 7.8    | 19.5  | 22.4  |
| CGP (%)            | All                | 13.4                                | 30.7  | 39.4  | 45.2    | 73.4  | 73.3  | 1.1     | 2.9   | 3.8   | 57.1   | 49.2  | 44.1  |
|                    | J                  | 13.8                                | 32.0  | 41.5  | 45.2    | 73.4  | 73.3  | 2.0     | 5.5   | 5.4   | 56.5   | 45.7  | 39.1  |
|                    | T                  | 9.8                                 | 17.1  | 18.5  | 21.5    | 54.6  | 63.0  | 1.1     | 2.9   | 3.8   | 53.4   | 76.7  | 78.4  |
| AC (%)             | All                | 18.2                                | 15.4  | 14.4  | 21.1    | 20.5  | 19.7  | 9.8     | 5.4   | 3.7   | 8.2    | 16.2  | 17.8  |
|                    | J                  | 18.2                                | 15.2  | 14.3  | 21.1    | 20.5  | 19.7  | 9.8     | 5.4   | 3.7   | 8.3    | 16.0  | 18.1  |
|                    | T                  | 19.0                                | 17.2  | 15.6  | 20.9    | 20.3  | 18.2  | 16.6    | 10.7  | 11.8  | 6.0    | 13.8  | 12.7  |
| ADV                | All                | 5.0                                 | 4.6   | 4.7   | 6.2     | 6.0   | 6.0   | 3.6     | 3.6   | 3.3   | 14.1   | 11.5  | 8.9   |
|                    | J                  | 5.0                                 | 4.5   | 4.7   | 6.1     | 6.0   | 6.0   | 3.6     | 3.6   | 3.3   | 13.9   | 10.4  | 8.3   |
|                    | T                  | 5.5                                 | 4.9   | 5.1   | 6.2     | 6.0   | 6.0   | 3.7     | 3.7   | 4.1   | 12.4   | 16.9  | 11.3  |
| PT (°C)            | All                | 79.4                                | 84.0  | 84.9  | 87.8    | 89.5  | 90.1  | 72.0    | 74.1  | 76.0  | 6.2    | 4.3   | 3.7   |
|                    | J                  | 79.2                                | 84.0  | 84.8  | 87.8    | 89.5  | 90.1  | 72.0    | 74.1  | 76.0  | 6.2    | 4.3   | 3.8   |
|                    | T                  | 81.4                                | 83.9  | 86.0  | 87.8    | 87.0  | 88.1  | 74.5    | 74.6  | 81.4  | 5.9    | 4.1   | 1.8   |
| PKV                | All                | 256.8                               | 241.9 | 251.8 | 321.0   | 301.0 | 325.2 | 212.3   | 185.4 | 80.9  | 8.2    | 9.1   | 9.7   |
|                    | J                  | 254.0                               | 238.3 | 249.1 | 317.8   | 296.7 | 302.9 | 212.3   | 185.4 | 80.9  | 7.6    | 8.1   | 9.3   |
|                    | T                  | 284.7                               | 278.6 | 279.5 | 321.0   | 301.0 | 325.2 | 254.9   | 247.7 | 253.6 | 6.2    | 5.3   | 6.8   |
| HPV                | All                | 166.0                               | 145.8 | 149.9 | 223.9   | 197.5 | 209.5 | 107.6   | 104.1 | 57.0  | 12.8   | 12.1  | 11.5  |
|                    | J                  | 167.0                               | 145.5 | 150.2 | 223.9   | 197.5 | 209.5 | 107.6   | 104.1 | 57.0  | 12.8   | 12.4  | 11.8  |
|                    | T                  | 155.8                               | 149.0 | 147.1 | 188.7   | 168.8 | 163.6 | 128.1   | 134.0 | 130.5 | 11.0   | 7.8   | 7.8   |
| CPV                | All                | 259.5                               | 229.4 | 235.7 | 318.3   | 294.1 | 292.0 | 154.5   | 150.3 | 73.1  | 8.7    | 9.3   | 10.0  |
|                    | J                  | 260.4                               | 229.3 | 236.3 | 318.3   | 294.1 | 292.0 | 154.5   | 150.3 | 73.1  | 8.7    | 9.4   | 10.1  |
|                    | T                  | 250.4                               | 230.2 | 229.6 | 282.2   | 267.3 | 259.2 | 222.5   | 194.4 | 200.0 | 7.6    | 8.4   | 8.0   |
| SBV                | All                | 2.7                                 | -12.5 | -16.1 | 54.8    | 38.5  | 49.4  | -84.2   | -95.5 | -86.7 | 808.3  | 168.5 | 127.4 |
|                    | J                  | 6.3                                 | -8.9  | -12.7 | 54.8    | 38.5  | 49.4  | -69.3   | -69.1 | -74.0 | 284.1  | 197.8 | 138.6 |
|                    | T                  | -34.2                               | -48.3 | -49.9 | -10.3   | -7.4  | -25.9 | -84.2   | -95.5 | -86.7 | 54.1   | 40.0  | 33.2  |
| BDV                | All                | 90.8                                | 96.1  | 102.0 | 156.4   | 154.9 | 163.6 | 45.6    | 50.3  | 23.9  | 20.7   | 17.5  | 16.6  |
|                    | J                  | 87.0                                | 92.8  | 98.9  | 123.4   | 124.3 | 130.5 | 45.6    | 50.3  | 23.9  | 16.8   | 13.9  | 14.2  |
|                    | T                  | 128.8                               | 129.6 | 132.4 | 156.4   | 154.9 | 163.6 | 107.9   | 98.7  | 113.4 | 9.5    | 11.0  | 9.1   |

<sup>a</sup> AC, amylose content; ADV, alkali digestion value; BDV, breakdown viscosity; CGP, chalky grains percentage; CPV, cool paste viscosity; HPV, hot paste viscosity; HRP, head rice percentage; PKV, peak viscosity; PT, pasting temperature; SBV, setback viscosity.

<sup>b</sup> J, Japonica varieties (n = 170); T, Tongil-type varieties (n = 17).

<sup>c</sup> CV coefficient of variance. F, field; GI, greenhouse I; GII greenhouse II.

**Supplemental Table 2.** Variations in grain quality traits according to maturity group evaluated in the three different growing conditions [Mean  $\pm$  SD (Range)]

| Trait <sup>a</sup> | Env <sup>b</sup> | Maturity Group <sup>c</sup>        |                                    |                                    |                                    |                                    |                                    |
|--------------------|------------------|------------------------------------|------------------------------------|------------------------------------|------------------------------------|------------------------------------|------------------------------------|
|                    |                  | I                                  | II                                 | III                                | IV                                 | V                                  | VI                                 |
| HRP (%)            | F                | 76.9 $\pm$ 7.55<br>(60.7–91.4)     | 72.2 $\pm$ 13.10<br>(46.5–94.9)    | 79.2 $\pm$ 7.29<br>(63.7–91.8)     | 82.3 $\pm$ 6.64<br>(68.3–92.4)     | 81.2 $\pm$ 7.45<br>(66.6–92.5)     | 84.5 $\pm$ 6.64<br>(66.6–93.8)     |
|                    | GI               | 53.5 $\pm$ 11.36<br>(18.8–75.7)    | 51.8 $\pm$ 14.94<br>(27.6–78.3)    | 51.2 $\pm$ 12.16<br>(32.0–83.4)    | 53.1 $\pm$ 15.31<br>(24.5–84.1)    | 69.9 $\pm$ 11.37<br>(42.1–87.5)    | 76.4 $\pm$ 9.93<br>(52.0–94.0)     |
|                    | GII              | 39.4 $\pm$ 11.70<br>(19.1–66.4)    | 37.6 $\pm$ 14.53<br>(17.9–68.1)    | 38.0 $\pm$ 11.38<br>(21.0–70.9)    | 43.0 $\pm$ 12.46<br>(21.5–68.3)    | 59.2 $\pm$ 12.35<br>(37.5–80.4)    | 71.8 $\pm$ 8.60<br>(54.5–89.7)     |
| CGP (%)            | F                | 13.7 $\pm$ 6.09<br>(2.8–28.0)      | 19.7 $\pm$ 11.41<br>(2.3–45.2)     | 13.5 $\pm$ 6.59<br>(3.9–26.2)      | 11.3 $\pm$ 5.43<br>(4.0–20.8)      | 12.8 $\pm$ 6.96<br>(2.0–28.5)      | 9.8 $\pm$ 5.38<br>(1.1–25.6)       |
|                    | GI               | 37.3 $\pm$ 11.78<br>(15.1–73.4)    | 38.8 $\pm$ 14.38<br>(11.4–63.0)    | 39.2 $\pm$ 11.70<br>(6.7–57.4)     | 36.7 $\pm$ 15.44<br>(10.1–67.0)    | 21.7 $\pm$ 10.34<br>(5.5–48.9)     | 15.2 $\pm$ 8.39<br>(2.9–36.1)      |
|                    | GII              | 49.9 $\pm$ 11.56<br>(24.0–69.5)    | 51.0 $\pm$ 15.65<br>(8.2–73.3)     | 49.1 $\pm$ 12.78<br>(9.3–67.9)     | 42.8 $\pm$ 15.76<br>(9.5–69.1)     | 30.2 $\pm$ 11.29<br>(11.6–51.0)    | 17.2 $\pm$ 8.46<br>(3.8–34.5)      |
| AC (%)             | F                | 16.8 $\pm$ 1.06<br>(15.0–18.9)     | 17.1 $\pm$ 1.89<br>(9.8–19.6)      | 18.2 $\pm$ 1.13<br>(14.2–19.5)     | 18.6 $\pm$ 0.75<br>(17.1–19.9)     | 19.0 $\pm$ 0.86<br>(16.3–20.4)     | 19.6 $\pm$ 0.9<br>(17.2–21.1)      |
|                    | GI               | 13.8 $\pm$ 1.75<br>(8.9–16.4)      | 14.4 $\pm$ 2.47<br>(5.4–17.6)      | 14.6 $\pm$ 1.69<br>(10.7–17.2)     | 13.8 $\pm$ 2.17<br>(8.2–17.5)      | 16.8 $\pm$ 1.54<br>(10.9–18.9)     | 18.5 $\pm$ 1.38<br>(15.3–20.5)     |
|                    | GII              | 12.7 $\pm$ 1.81<br>(8.6–16.7)      | 12.5 $\pm$ 2.93<br>(3.7–15.8)      | 13.4 $\pm$ 1.70<br>(9.2–15.6)      | 13.5 $\pm$ 1.75<br>(10.4–16.7)     | 15.9 $\pm$ 1.39<br>(12.1–18.5)     | 17.6 $\pm$ 0.89<br>(15.5–19.7)     |
| ADV                | F                | 4.6 $\pm$ 0.63<br>(3.7–5.9)        | 4.9 $\pm$ 0.78<br>(3.7–6.0)        | 4.8 $\pm$ 0.76<br>(3.6–6.0)        | 5.0 $\pm$ 0.67<br>(3.8–6.1)        | 5.3 $\pm$ 0.53<br>(4.1–6.0)        | 5.6 $\pm$ 0.5<br>(4.6–6.2)         |
|                    | GI               | 4.6 $\pm$ 0.50<br>(3.8–5.9)        | 4.4 $\pm$ 0.43<br>(3.6–5.2)        | 4.4 $\pm$ 0.36<br>(3.9–5.4)        | 4.3 $\pm$ 0.45<br>(3.7–5.5)        | 4.7 $\pm$ 0.47<br>(3.8–5.8)        | 5.0 $\pm$ 0.63<br>(4.1–6.0)        |
|                    | GII              | 4.6 $\pm$ 0.37<br>(3.6–5.1)        | 4.6 $\pm$ 0.57<br>(3.3–5.6)        | 4.7 $\pm$ 0.24<br>(4.1–5.0)        | 4.7 $\pm$ 0.30<br>(4.3–5.6)        | 4.8 $\pm$ 0.36<br>(4.0–5.7)        | 5.0 $\pm$ 0.51<br>(4.0–6.0)        |
| PT (°C)            | F                | 80.8 $\pm$ 4.40<br>(73.9–86.9)     | 78.9 $\pm$ 4.57<br>(73.7–87.2)     | 79.9 $\pm$ 5.07<br>(73.6–86.7)     | 79.5 $\pm$ 4.89<br>(73.6–87.8)     | 77.8 $\pm$ 5.34<br>(72.0–87.4)     | 80.1 $\pm$ 4.61<br>(72.6–87.8)     |
|                    | GI               | 84.2 $\pm$ 2.88<br>(78.4–88.6)     | 85.1 $\pm$ 2.63<br>(77.8–89.1)     | 83.5 $\pm$ 3.26<br>(76.9–88.2)     | 83.9 $\pm$ 2.82<br>(77.0–89.1)     | 82.5 $\pm$ 4.62<br>(74.1–89.5)     | 84.4 $\pm$ 4.25<br>(74.7–88.8)     |
|                    | GII              | 86.2 $\pm$ 1.62<br>(81.8–89.6)     | 85.8 $\pm$ 2.69<br>(78.1–89.6)     | 84.1 $\pm$ 2.74<br>(78.0–88.0)     | 84.4 $\pm$ 2.95<br>(77.8–88.4)     | 84.0 $\pm$ 4.02<br>(76.0–90.1)     | 85.1 $\pm$ 3.21<br>(76.7–88.1)     |
| PKV                | F                | 271.9 $\pm$ 20.53<br>(216.7–317.8) | 265.7 $\pm$ 23.62<br>(222.8–321.0) | 252.2 $\pm$ 15.39<br>(227.4–285.4) | 257.3 $\pm$ 18.54<br>(218.9–307.3) | 247.8 $\pm$ 14.59<br>(216.4–283.1) | 247.1 $\pm$ 21.19<br>(212.3–311.1) |
|                    | GI               | 251.0 $\pm$ 19.5<br>(202.9–296.7)  | 247.1 $\pm$ 22.29<br>(208.8–290.0) | 231.6 $\pm$ 19.58<br>(197.1–275.7) | 243.0 $\pm$ 20.17<br>(192.7–289.9) | 235.5 $\pm$ 20.83<br>(185.4–299.6) | 244.6 $\pm$ 25.92<br>(200.5–301.0) |
|                    | GII              | 254.6 $\pm$ 17.76<br>(219.6–289.4) | 246.5 $\pm$ 40.58<br>(80.9–299.0)  | 245.5 $\pm$ 18.63<br>(209.9–285.4) | 253.5 $\pm$ 22.66<br>(187.6–299.7) | 249.7 $\pm$ 21.52<br>(187.7–309.1) | 261.7 $\pm$ 20.39<br>(230.5–325.2) |
| HPV                | F                | 186.9 $\pm$ 16.50<br>(148.2–223.4) | 177.6 $\pm$ 20.84<br>(142.0–223.9) | 157.7 $\pm$ 16.28<br>(131.2–190.8) | 159.8 $\pm$ 17.96<br>(128.6–191.5) | 159.7 $\pm$ 15.91<br>(122.0–193.2) | 151.2 $\pm$ 17.52<br>(107.6–186.9) |
|                    | GI               | 159.6 $\pm$ 16.19<br>(125.7–188.2) | 152.1 $\pm$ 17.01<br>(109.9–197.5) | 134.4 $\pm$ 14.06<br>(113.4–169.0) | 138.5 $\pm$ 15.38<br>(111.6–176.9) | 142.5 $\pm$ 13.18<br>(119.0–174.6) | 144.4 $\pm$ 18.77<br>(104.1–190.3) |
|                    | GII              | 154.5 $\pm$ 13.38<br>(131.7–194.0) | 148.4 $\pm$ 22.42<br>(57.0–174.3)  | 141.5 $\pm$ 12.98<br>(116.2–173.0) | 148.6 $\pm$ 20.57<br>(96.8–209.5)  | 151.0 $\pm$ 17.07<br>(90.2–191.9)  | 152.6 $\pm$ 14.81<br>(118.5–191.0) |
| CPV                | F                | 278.4 $\pm$ 15.89<br>(235.9–308.4) | 267.4 $\pm$ 23.09<br>(220.7–318.3) | 248.8 $\pm$ 16.87<br>(218.6–285.9) | 254.7 $\pm$ 20.5<br>(216.1–300.9)  | 255.4 $\pm$ 17.52<br>(212.5–290.1) | 247.8 $\pm$ 26.10<br>(154.5–283.3) |
|                    | GI               | 239.2 $\pm$ 19.07<br>(189.5–273.2) | 229.4 $\pm$ 22.53<br>(168.9–294.1) | 212.6 $\pm$ 18.63<br>(171.5–263.6) | 223.4 $\pm$ 20.36<br>(190.3–275.7) | 232.0 $\pm$ 15.99<br>(203.0–264.0) | 233.5 $\pm$ 24.93<br>(150.3–275.7) |
|                    | GII              | 238.1 $\pm$ 13.97<br>(208.5–271.1) | 226.2 $\pm$ 35.60<br>(73.1–272.1)  | 223.8 $\pm$ 18.51<br>(179.1–273.9) | 235.7 $\pm$ 23.12<br>(177.7–292.0) | 241.2 $\pm$ 21.22<br>(160.5–280.1) | 244.1 $\pm$ 20.81<br>(174.5–280.4) |
| SBV                | F                | 6.5 $\pm$ 16.03<br>(–27.8–35.7)    | 1.7 $\pm$ 29.20<br>(–58.6–42.4)    | –3.4 $\pm$ 14.31<br>(–33.8–24.9)   | –2.6 $\pm$ 25.36<br>(–84.2–54.8)   | 7.7 $\pm$ 17.91<br>(–43.4–42.5)    | 0.7 $\pm$ 24.95<br>(–69.3–35.9)    |
|                    | GI               | –11.7 $\pm$ 16.29<br>(–42.9–23.9)  | –17.6 $\pm$ 25.65<br>(–66.5–38.5)  | –19.0 $\pm$ 15.59<br>(–53.7–7.4)   | –19.6 $\pm$ 22.47<br>(–95.5–27.7)  | –3.5 $\pm$ 18.92<br>(–62.2–31.7)   | –11.1 $\pm$ 24.29<br>(–70.2–24.0)  |
|                    | GII              | –16.5 $\pm$ 15.96<br>(–44.3–17.3)  | –20.3 $\pm$ 27.59<br>(–71.7–24.6)  | –21.7 $\pm$ 15.81<br>(–56.6–5.7)   | –17.8 $\pm$ 20.28<br>(–86.7–16.5)  | –8.4 $\pm$ 19.73<br>(–50.4–49.4)   | –17.6 $\pm$ 21.42<br>(–74.0–11.9)  |
| BDV                | F                | 85.0 $\pm$ 14.56<br>(53.1–120.1)   | 88.1 $\pm$ 24.55<br>(45.6–141.9)   | 94.5 $\pm$ 13.56<br>(68.3–122.5)   | 97.4 $\pm$ 21.33<br>(54.6–156.4)   | 88.1 $\pm$ 17.17<br>(51.8–136.9)   | 95.9 $\pm$ 19.44<br>(64.5–139.0)   |
|                    | GI               | 91.3 $\pm$ 12.16<br>(66.4–124.3)   | 95.0 $\pm$ 18.83<br>(50.3–132.5)   | 97.1 $\pm$ 14.18<br>(66.1–124.1)   | 104.5 $\pm$ 16.76<br>(71.2–154.9)  | 93.0 $\pm$ 16.72<br>(66.4–143.4)   | 100.2 $\pm$ 19.76<br>(70.6–152.2)  |
|                    | GII              | 100.1 $\pm$ 10.93<br>(81.4–122.0)  | 98.1 $\pm$ 24.59<br>(23.9–137.3)   | 104.1 $\pm$ 12.30<br>(83.5–129.9)  | 105.0 $\pm$ 15.27<br>(82.5–151.7)  | 98.7 $\pm$ 17.58<br>(45.7–145.5)   | 109.2 $\pm$ 16.5<br>(87.0–163.6)   |

<sup>a</sup> AC, amylose content; ADV, alkali digestion value; BDV, breakdown viscosity; CGP, chalky grains percentage; CPV, cool paste viscosity; HPV, hot paste viscosity; HRP, head rice percentage; PKV, peak viscosity; PT, pasting temperature; SBV, setback viscosity.

<sup>b</sup> F, field; GI, greenhouse I; GII, greenhouse II.

<sup>c</sup> A total of 187 nonglutinous Korean rice varieties were divided into six maturity groups (I–VI) according to their heading dates (see Supplemental Table 1 for the number of varieties in each group and the average temperature during grain filling for each maturity group).
